# Supplementary material for: Prognostic Abilities of Pre- and Post-Treatment Inflammatory Markers in Oral Squamous Cell Carcinoma: Stepwise Modelling
Source: MDPI journal article supplement (doi:10.3390/medicina58101426), 2022-10-10

Supplementary file S1: Kaplan–Meier graphs for OS and DFS of the markers that were identified as having significant prognostic abilities

Figure S1. Kaplan-Meier estimates for overall survival (OS), stratified by levels of lymphocyte-to-monocyte ratio (LMR)

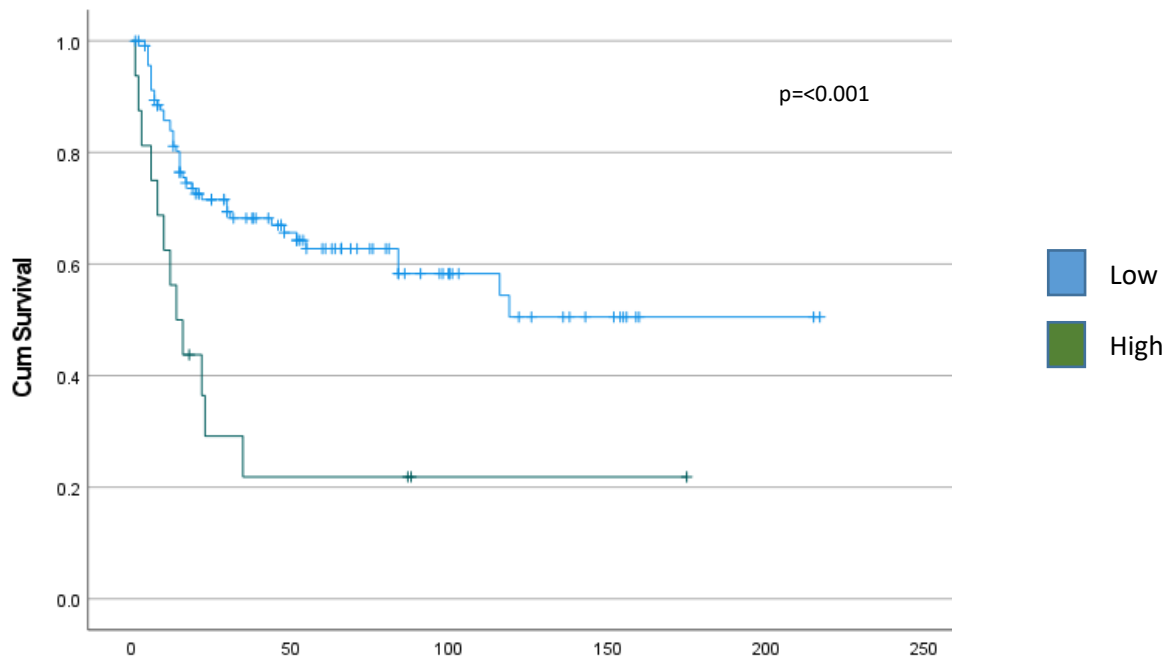

Figure S2. Kaplan-Meier estimates for overall survival (OS), stratified by levels of platelet count (PLC)

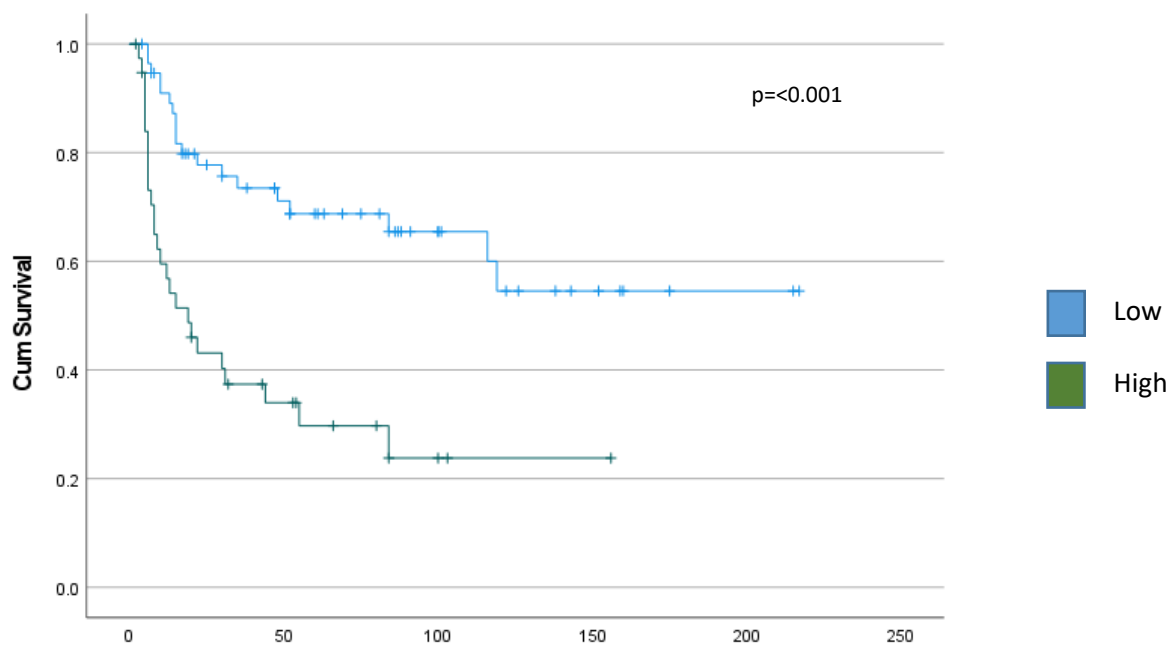

Figure S3. Kaplan-Meier estimates for overall survival (OS), stratified by levels of platelet-to-lymphocyte ratio (PLR)

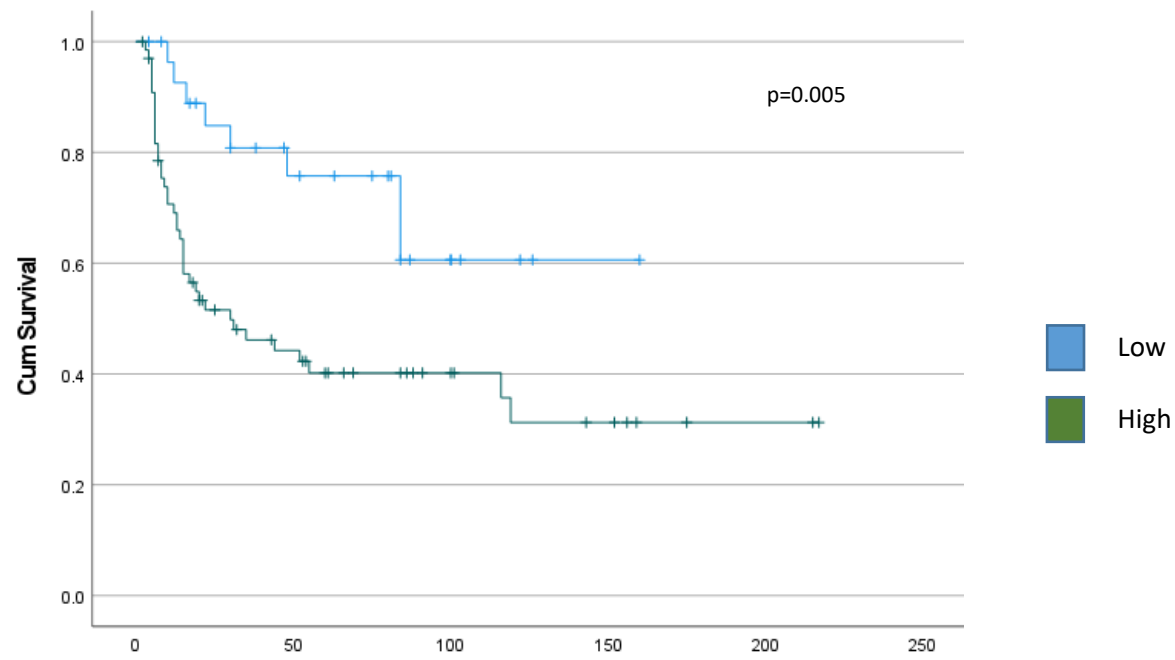

Figure S4. Kaplan-Meier estimates of disease-free survival (DFS), stratified by levels of systemic immune-inflammation index (SII)

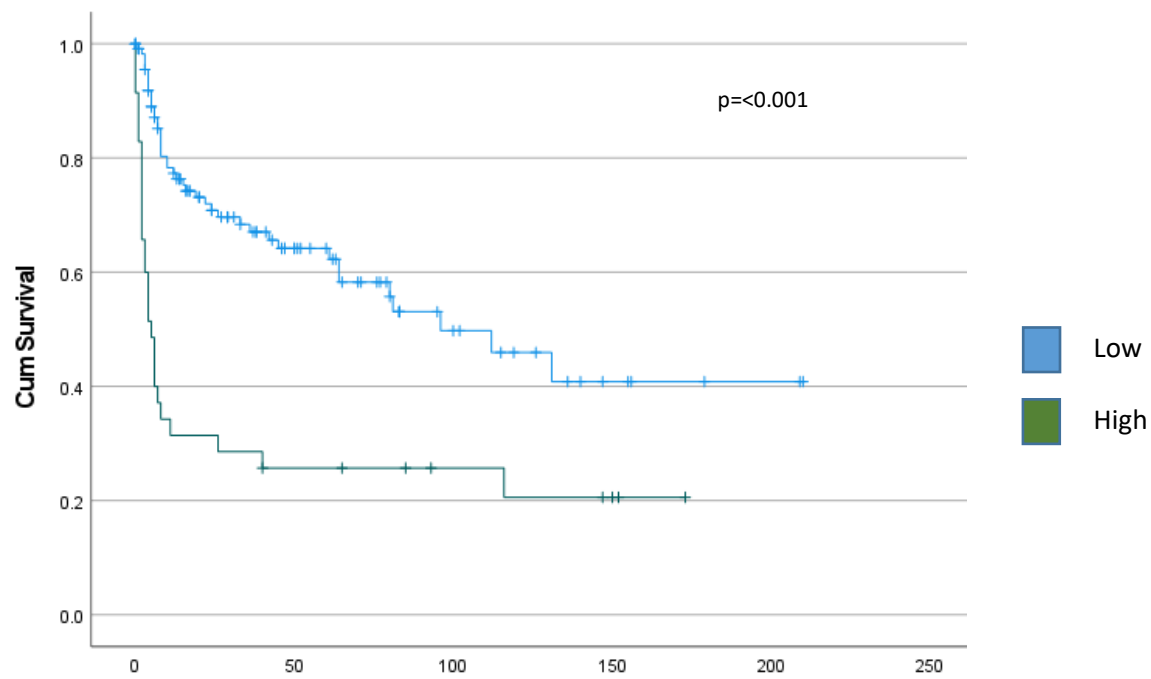

Figure S5. Kaplan-Meier estimates of disease-free survival (DFS), stratified by levels of platelet count (PLC)

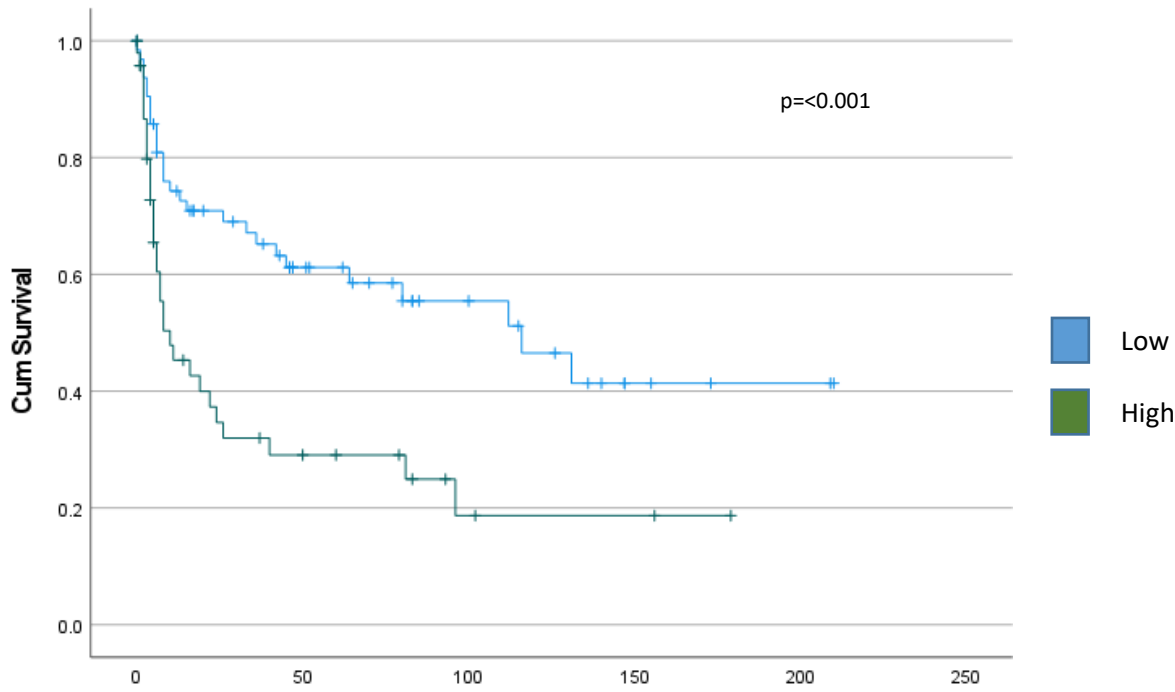

Figure S6. Kaplan-Meier estimates of disease-free survival (DFS), stratified by levels of platelet-to-lymphocyte ratio (PLR)

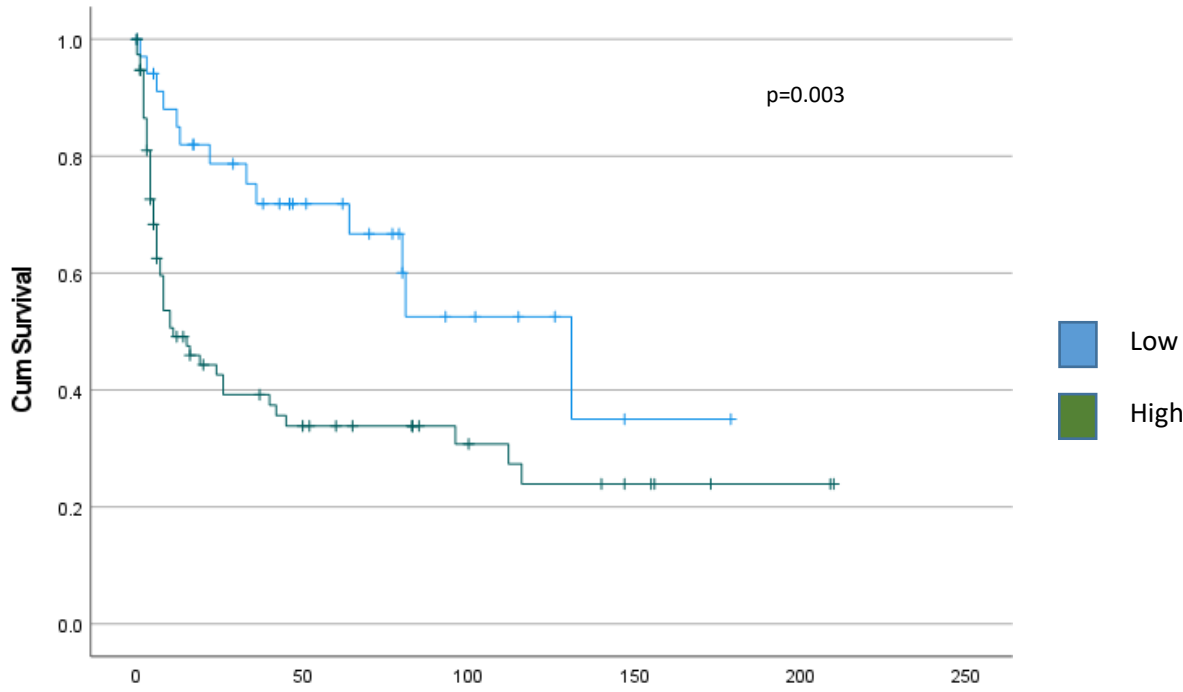

Supplement: s1 [file s1]
